# Supplementary material for: Profiling of the small RNA populations in human testicular germ cell tumors shows global loss of piRNAs
Source: PubMed Central journal article supplement (PMC4533958; doi:10.1186/s12943-015-0411-4), 2015-08-12
Supplement: 12943_2015_411_MOESM2_ESM.pdf [file 12943_2015_411_MOESM2_ESM.pdf]

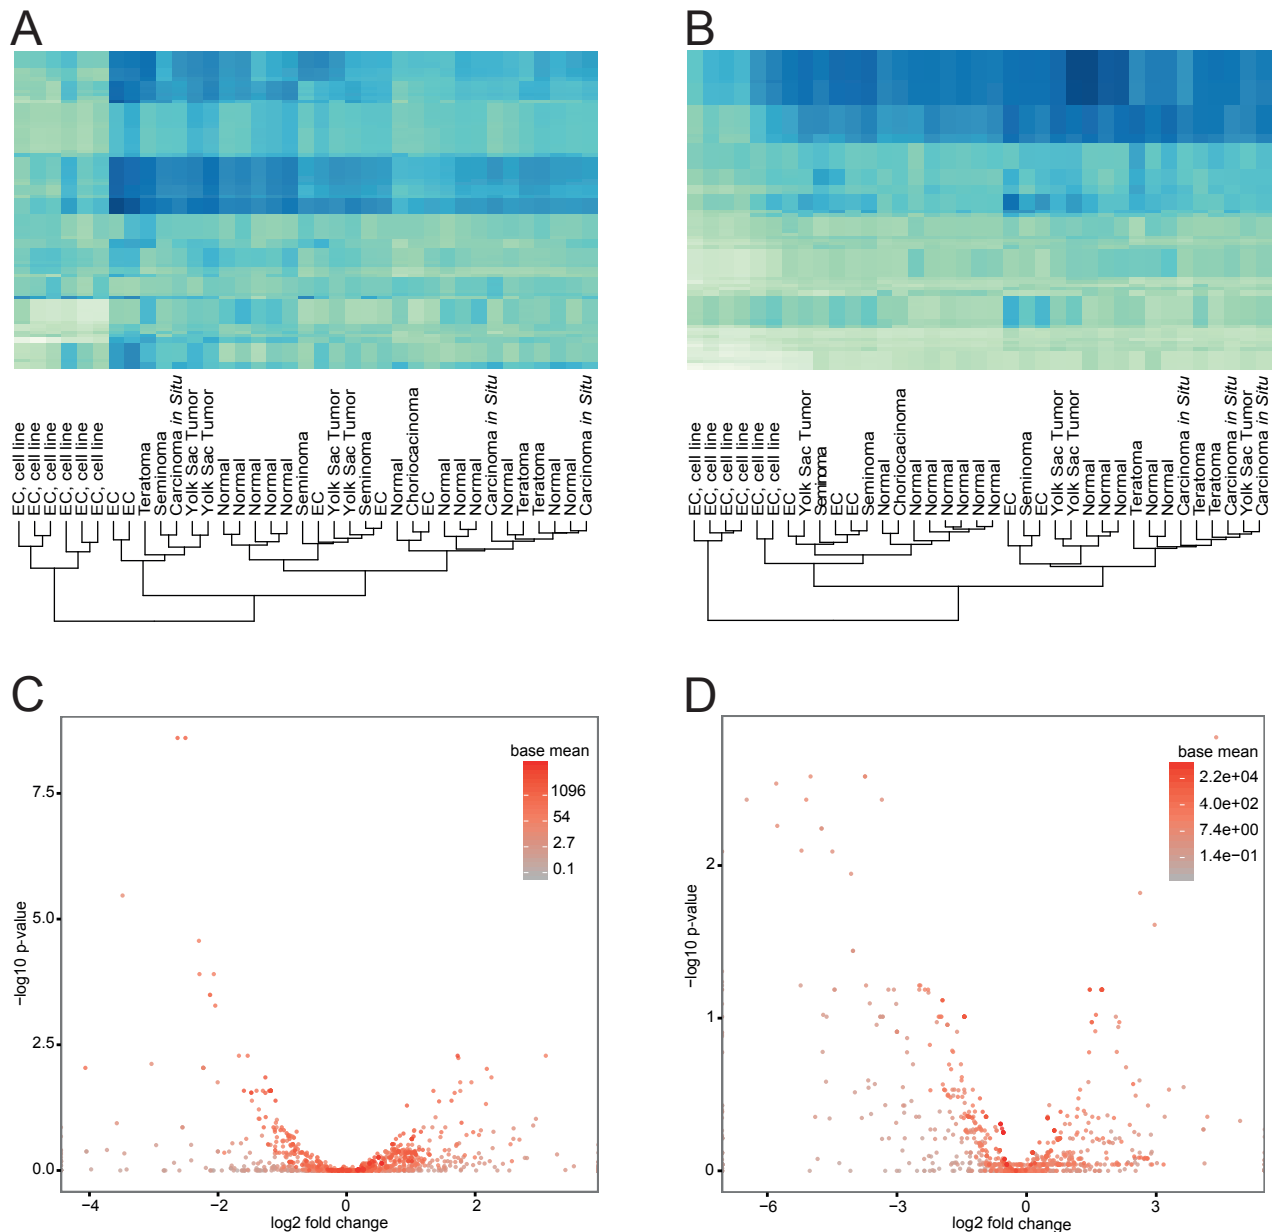

### tRNA-derived small RNA expression in normal and TGCT samples.

**A** Heatmap showing the expression data of the most highly expressed tRFs (variance stabilization transformed data). The dendrogram (bottom) indicates clustering according to expression profiles.

**B** Heatmap showing the expression data of the most highly expressed tRNA halves (variance stabilization transformed data). The dendrogram (bottom) indicates clustering according to expression profiles.

**C** Volcano plot indicating the relationship between the Log<sub>2</sub> fold change and p-values (Benjamini-Hochberg adjusted) for tRFs when comparing TGCT with normal samples. The CIS samples are included in the TGCT group. Color coding indicates the expression level as a function of normalized counts (BaseMean).

**D** Volcano plot indicating the relationship between the Log<sub>2</sub> fold change and p-values (Benjamini-Hochberg adjusted) for tRNA halves when comparing TGCT with normal samples. The CIS samples are included in the TGCT group. Color coding indicates the expression level as a function of normalized counts (BaseMean).
