# Supplementary material for: Profiling of the small RNA populations in human testicular germ cell tumors shows global loss of piRNAs
Source: PubMed Central journal article supplement (PMC4533958; doi:10.1186/s12943-015-0411-4), 2015-08-12
Supplement: 12943_2015_411_MOESM4_ESM.pdf [file 12943_2015_411_MOESM4_ESM.pdf]

Differentially expressed miRNAs with  $p < 10^{-6}$  when adjusting for multiple testing with the Benjamini-Hochberg procedure.

|    | miRNA           | Log2 Fold Change | p-value (adjusted) |
|----|-----------------|------------------|--------------------|
| 1  | hsa-miR-302d-3p | 11,25            | 1,95E-13           |
| 2  | hsa-miR-302a-3p | 11,65            | 1,23E-12           |
| 3  | hsa-mir-302b    | 11,38            | 1,23E-12           |
| 4  | hsa-mir-302a    | 11,18            | 7,26E-12           |
| 5  | hsa-miR-367-3p  | 10,20            | 1,48E-11           |
| 6  | hsa-miR-371a-5p | 9,29             | 2,09E-11           |
| 7  | hsa-miR-371b-3p | 9,29             | 2,09E-11           |
| 8  | hsa-miR-302c-5p | Inf              | 3,45E-11           |
| 9  | hsa-miR-302d-5p | Inf              | 1,38E-10           |
| 10 | hsa-miR-302c-3p | 11,32            | 1,38E-10           |
| 11 | hsa-miR-371a-3p | 8,86             | 2,28E-09           |
| 12 | hsa-miR-371b-5p | 8,86             | 2,28E-09           |
| 13 | hsa-miR-372-3p  | 8,35             | 5,59E-09           |
| 14 | hsa-miR-373-3p  | 8,10             | 5,37E-09           |
| 15 | hsa-miR-205-5p  | 8,43             | 5,59E-08           |
| 16 | hsa-miR-302b-5p | 10,71            | 5,59E-08           |
| 17 | hsa-miR-302e    | Inf              | 5,26E-07           |
| 18 | hsa-miR-372-5p  | 7,67             | 5,26E-07           |
| 19 | hsa-miR-141-3p  | 7,15             | 1,14E-06           |
| 20 | hsa-miR-200c-3p | 8,19             | 1,40E-06           |
| 21 | hsa-miR-141-5p  | 8,69             | 1,91E-06           |
| 22 | hsa-miR-373-5p  | 6,26             | 2,66E-06           |
| 23 | hsa-miR-7159-3p | -5,68            | 6,52E-06           |
