# Supplementary material for: Profiling of the small RNA populations in human testicular germ cell tumors shows global loss of piRNAs
Source: PubMed Central journal article supplement (PMC4533958; doi:10.1186/s12943-015-0411-4), 2015-08-12
Supplement: 12943_2015_411_MOESM5_ESM.pdf [file 12943_2015_411_MOESM5_ESM.pdf]

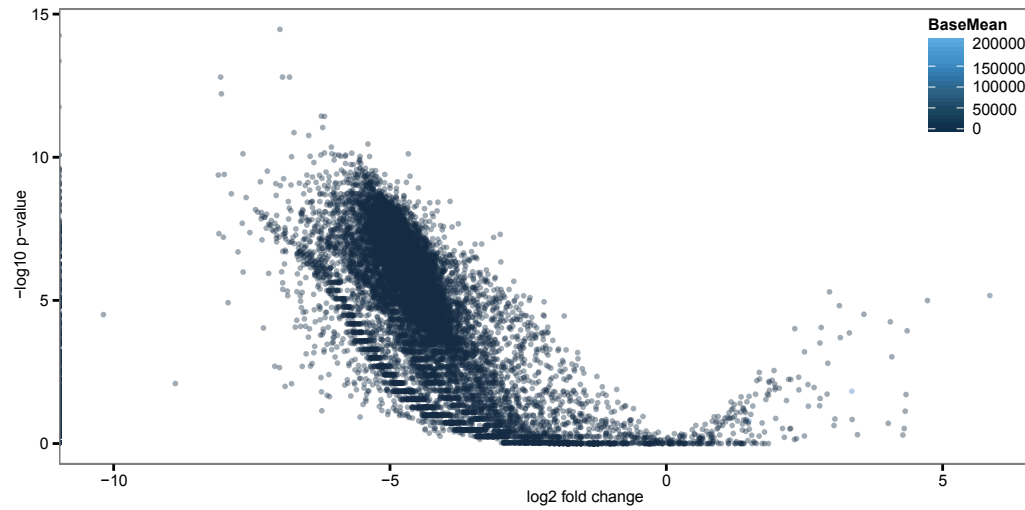

**Expression of piRNABank sequences.** Volcano plot indicating the relationship between the Log2 fold change and p-values (Benjamini-Hochberg adjusted) for sequences overlapping with piRNABank when comparing TGCT with normal samples. The CIS samples are included in the TGCT group. Color coding indicates the expression level as a function of normalized counts (BaseMean).
