# Supplementary material for: Profiling of the small RNA populations in human testicular germ cell tumors shows global loss of piRNAs
Source: PubMed Central journal article supplement (PMC4533958; doi:10.1186/s12943-015-0411-4), 2015-08-12
Supplement: 12943_2015_411_MOESM6_ESM.pdf [file 12943_2015_411_MOESM6_ESM.pdf]

**Top 10 differentially expressed piRNAs overlapping with sequences from piRNABank (Benjamini-Hochberg adjusted)**

|    | <b>id</b>      | <b>log2FoldChange</b> | <b>p adjusted</b> |
|----|----------------|-----------------------|-------------------|
| 1  | hsa_piR_008857 | -6.991032             | 3.407340e-15      |
| 2  | hsa_piR_003068 | -Inf                  | 5.542997e-15      |
| 3  | hsa_piR_014984 | -Inf                  | 4.332005e-14      |
| 4  | hsa_piR_004874 | -6.818212             | 1.583720e-13      |
| 5  | hsa_piR_002915 | -6.944997             | 1.583720e-13      |
| 6  | hsa_piR_003656 | -8.064095             | 1.583720e-13      |
| 7  | hsa_piR_012719 | -8.050329             | 6.081981e-13      |
| 8  | hsa_piR_004362 | -Inf                  | 1.766860e-12      |
| 9  | hsa_piR_004186 | -6.243533             | 3.672874e-12      |
| 10 | hsa_piR_015508 | -6.184461             | 3.753682e-12      |
