# Supplementary material for: Profiling of the small RNA populations in human testicular germ cell tumors shows global loss of piRNAs
Source: PubMed Central journal article supplement (PMC4533958; doi:10.1186/s12943-015-0411-4), 2015-08-12
Supplement: 12943_2015_411_MOESM7_ESM.pdf [file 12943_2015_411_MOESM7_ESM.pdf]

## qPCR primers for small RNA expression validation

| Small RNA name*    | Assay type (Qiagen)               | Sequence** / order number   |
|--------------------|-----------------------------------|-----------------------------|
| RNU6B              | predesigned miScript Primer Assay | MS00033740                  |
| miR-302b-3p        | predesigned miScript Primer Assay | MS00003906                  |
| miR-372-3p         | predesigned miScript Primer Assay | MS00004067                  |
| miR-373-3p         | predesigned miScript Primer Assay | MS00031815                  |
| piR-006113         | custom miScript Primer Assay      | UUGGGAAAUGCAACAUUUGGGCAGGA  |
| piR-019085         | custom miScript Primer Assay      | ACAAGACAAAGAGAUAAAGAGAAAGCA |
| piR-007509         | custom miScript Primer Assay      | AGAAUUUAUGGUUUGUAGGGCAUGA   |
| tRF Glu-GAG, chr13 | custom miScript Primer Assay      | UCCCACAUGGUCUAGCG           |
| tRF Glu-GAG, chr15 | custom miScript Primer Assay      | UCCCACAUGGUCUAGCGGU         |
| tRF Gly-GGA, chr20 | custom miScript Primer Assay      | GCGUUGGUGGUAGUGG            |

\* The piRNA (piR) and tRF sequences were found using IGV visualization of sequence reads

\*\* The sequence used in the Qiagen miScript service for custom miRNA primer design
