# Supplementary material for: Profiling of the small RNA populations in human testicular germ cell tumors shows global loss of piRNAs
Source: Springer Nature journal article supplement (doi:10.1186/s12943-015-0411-4), 2015-08-11
Supplement: MOESM3 [file 9763166]

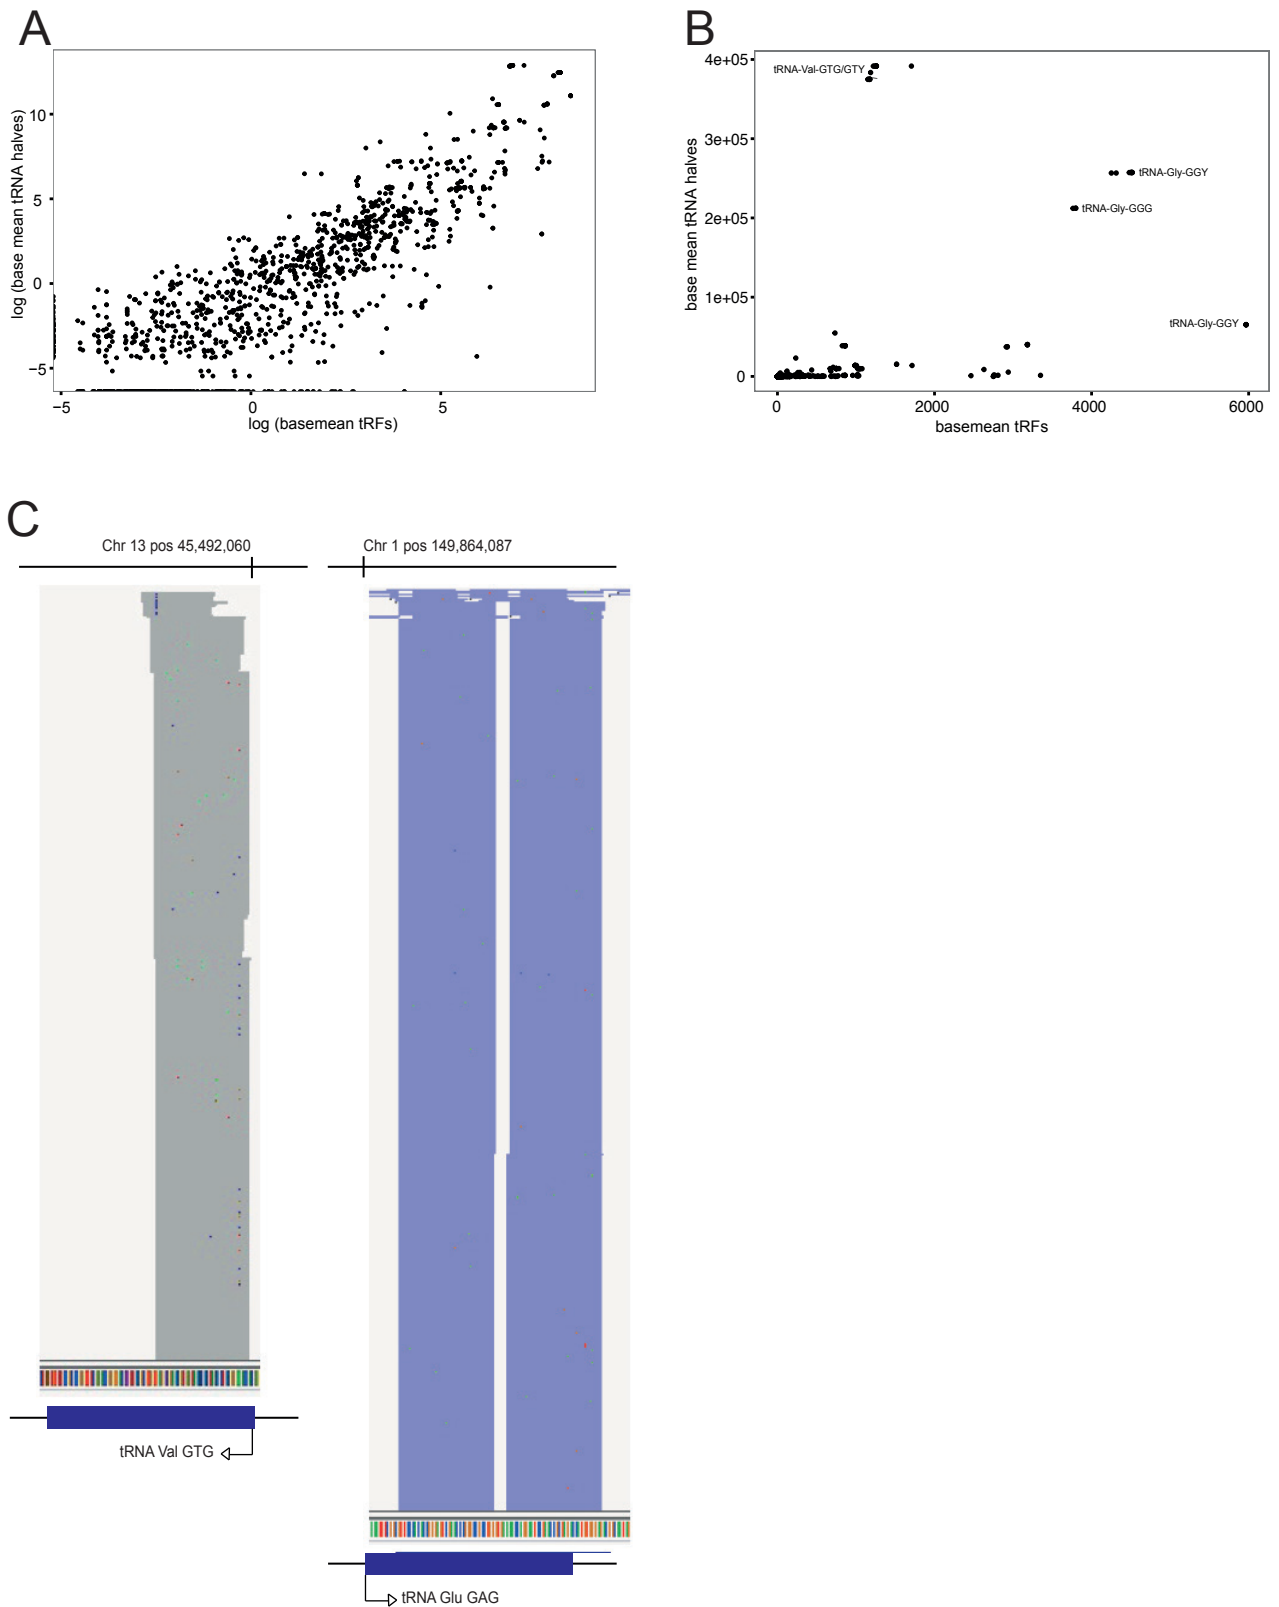

**Correlation between tRFs and tRNA halves in normal and TGCT samples.** Correlation plots indicating the relationship between tRNA isotypes in the tRF and tRNA halve populations. The plots are prepared using a log scale (**A**) and a normal scale (**B**). **C** Examples of the distribution of tRNA-derived small RNA sequence in two representative tRNA genes. Most tRNA-derived sequences are derived from the 5' end of mature tRNAs (left), whereas a few tRNAs give rise to both 5' and 3' sequences(right). Horizontal grey and blue lines represent sequences derived from tRNAs. Multicolored horizontal bars represent individual bases.
